# Supplementary material for: De novo genome assemblies of two cryptodiran turtles with ZZ/ZW and XX/XY sex chromosomes provide insights into patterns of genome reshuffling and uncover novel 3D genome folding in amniotes
Source: HighWire-hosted journal article supplement (doi:10.1101/gr.279443.124), 2024-10-01
Supplement: Supplemental_Material.pdf [file Supplemental_Material.pdf]

# SUPPLEMENTAL MATERIAL

***De novo* genome assemblies of two cryptodiran (hidden-neck) turtles with ZZ/ZW and XX/XY sex chromosomes provide insights into patterns of genome reshuffling and uncover novel 3D genome folding in amniotes**

Bista B<sup>1,†</sup>, González-Rodelas L<sup>2,3,†</sup>, Álvarez-González L<sup>2</sup>, Wu ZQ<sup>1,4</sup>, Montiel EE<sup>1,5</sup>, Lee LS<sup>1,6</sup>, Badenhorst DB<sup>1</sup>, Radhakrishnan S<sup>1</sup>, Litterman R<sup>1</sup>, Navarro-Dominguez B<sup>1,7</sup>, Iverson JB<sup>8</sup>, Orozco-Arias S<sup>9</sup>, González J<sup>9</sup>, Ruiz-Herrera A<sup>2,3,\*</sup>, Valenzuela N<sup>1,\*</sup>

<sup>1</sup> Department of Ecology, Evolution, and Organismal Biology, Iowa State University, Ames, IA, USA.

<sup>2</sup> Departament de Biologia Cel·lular, Fisiologia i Immunologia, Universitat Autònoma de Barcelona, Cerdanyola del Vallès, Spain.

<sup>3</sup> Genome Integrity and Instability Group, Institut de Biotecnologia i Biomedicina, Universitat Autònoma de Barcelona, Cerdanyola del Vallès, Spain.

<sup>4</sup> Guangdong Laboratory for Lingnan Modern Agriculture, Agricultural Genomics Institute at Shenzhen, Chinese Academy of Agricultural Sciences, Shenzhen, China

<sup>5</sup> Present address: Departamento de Biología (Genética), Facultad de Ciencias, Universidad Autónoma de Madrid, Madrid, Spain.

<sup>6</sup> Present address: Unit on Chromosome Dynamics, Division of Developmental Biology, Eunice Kennedy Shriver National Institute of Child Health and Human Development, National Institutes of Health, Bethesda, MD, USA

<sup>7</sup> Present address: Departamento de Genética, Facultad de Ciencias, Universidad de Granada, Granada, Spain

<sup>8</sup> Department of Biology, Earlham College, Richmond, IN, USA.

<sup>9</sup> Institute of Evolutionary Biology, CSIC, UPF, Barcelona, Spain.

**† First authors.**

**\*Corresponding authors.**

## THIS FILE CONTAINS:

- **Supplemental Methods**
- **Supplemental Tables S1 – S5**
- **Supplemental Figures S1 – S6**
- **Supplementary References**

## SUPPLEMENTARY METHODS

### Initial *de novo* assemblies of the *Apalone* and *Staurotypus* genomes

A *de novo* assembly for *Apalone* was constructed using a combination of paired end reads (mean insert size ~390 bp and ~402 bp). The *de novo* assembly was obtained using Meraculous v.2.2.4 (diploid\_mode 1) (Chapman et al. 2011) with a k-mer size of 55. The input data consisted 738,242,104 read pairs sequenced from paired-end libraries (totaling 205.90 Gbp; 110.8 × coverage). The *de novo* assembly for *Staurotypus* was generated at a different time than for *Apalone*, from two Illumina lanes of paired-end 100 bp reads from the adult male and one adult female, and two lanes of 150 bp paired-end reads from the adult male, totaling 1,636,140,000 reads (72.1 × coverage; Table S1), which were assembled in Platanus v.1.2.4 (Kajitani et al. 2014). Reads were trimmed for quality, sequencing adapters, and mate pair adapters before assembly using Trimmomatic v.0.40 (Bolger et al. 2014).

### Chicago library preparation and sequencing

Three Chicago libraries were prepared for *Apalone* and four for *Staurotypus* as described previously (Putnam et al, 2016). Briefly, for each library, ~500ng of HMW gDNA (mean fragment length = 40 kbp for *Apalone* and 50 kbp for *Staurotypus*) was reconstituted into chromatin *in vitro* and fixed with formaldehyde. Fixed chromatin was digested with DpnII, the 5' overhangs filled in with biotinylated nucleotides, and then free blunt ends were ligated. After ligation, crosslinks were reversed and the DNA purified from protein. Purified DNA was treated to remove biotin that was not internal to ligated fragments. The DNA was then sheared to ~350 bp mean fragment size and sequencing libraries were generated using NEBNext Ultra enzymes and Illumina-compatible adapters. Biotin-containing fragments were isolated using streptavidin beads before PCR enrichment of each library. The libraries were sequenced on an Illumina HiSeq X (rapid run mode).

### Dovetail Hi-C library preparation and sequencing (multiple libraries)

Three Dovetail Hi-C libraries were prepared for *Apalone* and two for *Staurotypus* in a similar manner as described previously (Lieberman-Aiden et al. 2009). Briefly, for each library, chromatin was fixed in place with formaldehyde in the nucleus and then extracted. Fixed chromatin was digested with DpnII, the 5' overhangs filled in with biotinylated nucleotides, and then free blunt ends were ligated. After ligation, crosslinks were reversed and the DNA purified from protein. Purified DNA was treated to remove biotin that was not internal to ligated fragments. The DNA was then sheared

to ~350 bp mean fragment size and sequencing libraries were generated using NEBNext Ultra enzymes and Illumina-compatible adapters. Biotin-containing fragments were isolated using streptavidin beads before PCR enrichment of each library. The libraries were sequenced on an Illumina HiSeq X (rapid run mode).

### **Scaffolding the *Apalone* and *Staurotypus* assemblies with HiRise**

The initial *de novo* assembly, shotgun reads, Chicago library reads, and Dovetail Hi-C library reads were used as input data for HiRise v.2016, a software pipeline designed specifically for using proximity ligation data to scaffold genome assemblies (Putnam et al. 2016). An iterative analysis was conducted. First, Shotgun and Chicago library sequences were aligned to the draft input assembly using a modified SNAP read mapper (<http://snap.cs.berkeley.edu>). The separations of Chicago read pairs mapped within draft scaffolds were analyzed by HiRise to produce a likelihood model for genomic distance between read pairs, and the model was used to identify and break putative misjoins, to score prospective joins, and make joins above a threshold. After aligning and scaffolding Chicago data, Dovetail Hi-C library sequences were aligned and scaffolded following the same method. After scaffolding, shotgun sequences were used to close gaps between contigs. Because the HiRise *Apalone* assembly thus obtained lacked the sex chromosome, a Z/W scaffold was identified by its homology to chicken GGA-15 (Kawagoshi et al. 2009; Badenhorst et al. 2013) from a publicly available fragmentary *Apalone* assembly (GCA\_000385615.1) after scaffolding it using Ragtag2 v.2.1.0 followed by an Omni-C scaffolding as described by (Alonge et al. 2022). The quality of the resulting scaffolded- GCA\_000385615.1 assembly was lower than the HiRise *de novo* genome assembly (Supplemental Table S4), such that only the Z scaffold was lifted and added to the *de novo* HiRise assembly for the comparative genomic analyses.

### **Curation of the Hi-C assembly**

ASP and STR assembled genomes were manually curated using Hi-C and the Juicer/3D-DNA pipeline described in (Dudchenko et al. 2017) with default parameters. The curation was performed with Juicebox v.1.11.08 (Robinson et al. 2018). During this curation process some scaffolds were reoriented and superscaffolds were fragmented into smaller scaffolds. The criteria used to do the manual curation included: centromeric contacts position, contacts outside the diagonal, and HSBs analysis. To accelerate the process, the pre-curated assemblies were wrapped with the script `wrap-fasta-sequence.awk` from 3D-DNA utils package.

**Supplemental Table S1:** Read number and length from the sequencing of TruSeq, Chicago and Hi-C libraries.

|                                               |                    | <i>Staurotypus</i> | <i>Apalone</i>  |
|-----------------------------------------------|--------------------|--------------------|-----------------|
| <b>Illumina shotgun sequencing</b>            |                    |                    |                 |
|                                               | <b>Read length</b> | <b>2x125 bp</b>    | <b>2x400bp</b>  |
| Library 1 (million reads)                     |                    | 524.8              | 439.4           |
| Library 2 (million reads)                     |                    | 428.5              | 281             |
|                                               | <b>Read length</b> | <b>2x100 bp</b>    |                 |
| Male Library (million reads)                  |                    | 320.1              |                 |
| Female Library (million reads)                |                    | 362.8              |                 |
| Combined genome coverage (100-125 bp pairs)   |                    | 72.1 ×             | 110.8 ×         |
| <b>Chicago library sequencing</b>             |                    |                    |                 |
|                                               | <b>Read length</b> | <b>2x100 bp</b>    | <b>2x150 bp</b> |
| Library 1 (million reads)                     |                    | 91                 | 106             |
| Library 2 (million reads)                     |                    | 83                 | 130             |
| Library 3 (million reads)                     |                    | 88                 | 98              |
| Library 4 (million reads)                     |                    | 90                 |                 |
| Combined genome coverage (1-100 kb pairs)     |                    | 37.42 ×            | 30.53 ×         |
| <b>Hi-C library and sequencing</b>            |                    |                    |                 |
|                                               | <b>Read length</b> | <b>2x150 bp</b>    | <b>2x150 bp</b> |
| Library 1 (million reads)                     |                    | 231                | 136             |
| Library 2 (million reads)                     |                    | 281                | 149             |
| Library 3 (million reads)                     |                    |                    | 132             |
| Combined genome coverage (10-10,000 kb pairs) |                    | 4,051.13 ×         | 28,455.65 ×     |

**Supplemental Table S2:** Turtle genomes assembled in this study or compared to the new assemblies as described in the text, in alphabetical order.

| Species                          | Common name                    | NCBI accession number | Source                |
|----------------------------------|--------------------------------|-----------------------|-----------------------|
| <i>Apalone spinifera</i>         | Spiny softshell turtle         | PRJNA837702           | This study            |
| <i>Caretta caretta</i>           | Loggerhead sea turtle          | GCF_023653815.1       | (Chang et al. 2023)   |
| <i>Carettochelys insculpta</i>   | Pig-nosed turtle               | GCA_033958435.1       | (Li et al. 2024)      |
| <i>Chelonia mydas</i>            | Green sea turtle               | GCF_015237465.2       | (Bentley et al. 2023) |
| <i>Chrysemys picta</i>           | Painted turtle                 | GCF_000241765.5       | (Lee et al. 2020)     |
| <i>Dermochelys coriacea</i>      | Leatherback sea turtle         | GCF_009764565.3       | (Bentley et al. 2023) |
| <i>Gallus gallus</i>             | Chicken                        | GCA_016699485.1       | (Warren et al. 2023)  |
| <i>Gopherus evgoodei</i>         | Goode's thornscrub tortoise    | GCF_007399415.2       | (Rhie et al. 2021)    |
| <i>Gopherus flavomarginatus</i>  | Bolson tortoise                | GCF_025201925.1       | (Rhie et al. 2021)    |
| <i>Malaclemys terrapin</i>       | Diamondback terrapin           | GCF_027887155.1       | (Rhie et al. 2021)    |
| <i>Mauremys mutica</i>           | Asian yellow pond turtle       | GCF_020497125.1       | (Liu et al. 2022)     |
| <i>Mauremys reevesii</i>         | Chinese pond turtle            | GCF_016161935.1       | (Liu et al. 2021a)    |
| <i>Pelochelys cantorii</i>       | Asian giant softshell turtle   | GCA_032595735.1       | (Liu et al. 2023)     |
| <i>Pelodiscus sinensis</i>       | Chinese softshell turtle       | GCF_000230535.1       | (Wang et al. 2013)    |
| <i>Rafetus swinhoei</i>          | Yangtze giant softshell turtle | GCA_019425775.1       | (Ren et al. 2022)     |
| <i>Staurotypus triporcatus</i>   | Mexican musk turtle            | PRJNA1021228          | This study            |
| <i>Trachemys scripta elegans</i> | Red-eared slider turtle        | GCA_013100865.1       | (Simison et al. 2020) |

**Supplemental Table S3:** Chromosome homology between chicken (*Gallus gallus* - GGA) and turtles [*Apalone spinifera* (ASP), *Trachemys scripta* (TSC), and *Pelodiscus sinensis* (PSI)], based on genome sequencing, whole chromosome painting (WCP), or BAC in situ hybridization, from this study, O'Connor et al. 2018, Kasai et al. 2012, and Matsuda et al. 2005. Red font indicates few discrepancies likely due to differences between studies in the nomenclature of similar size chromosomes in turtles.

| GGA (this study) | ASP (this study) | GGA (O'Connor et al. 2018) | Signal of GGA-WCP OR <u>GGA-BAC</u> hybridization in ASP (from O'Connor et al. 2018) | GGA WCP (Kasai et al. 2012) | TSC signal (Kasai et al. 2012) | GGA WCP (Matsuda et al. 2005) | PSI signal (Matsuda et al. 2005) |
|------------------|------------------|----------------------------|--------------------------------------------------------------------------------------|-----------------------------|--------------------------------|-------------------------------|----------------------------------|
| 1                | 1                | 1                          | Weak                                                                                 | 1                           | 1                              | 1                             | 1                                |
| 2                | 2                | 2                          | One chromosome                                                                       | 2                           | 2                              | 2                             | 2                                |
| 3                | 3                | 3                          | One chromosome                                                                       | 3                           | 3                              | 3                             | 3                                |
| 4                | 5 + 17           | 4                          | Two chromosomes                                                                      | 4                           | 5 + 7                          | 4                             | 4                                |
| 5                | 4                | 5                          | Weak                                                                                 | 5                           | 4q                             | 5                             | 5                                |
| 6                | 8                | 6                          | One chromosome                                                                       | 6                           | 7q                             |                               |                                  |
| 7                | 7                | 7                          | One chromosome                                                                       | 7                           | 11                             |                               |                                  |
| 8                | 15b              | 8                          | One chromosome                                                                       | 8                           | 8q                             |                               |                                  |
| 9                | 12               | 9                          | One chromosome                                                                       |                             |                                |                               |                                  |
| 10               | 14               | 10                         | Large signal in 10, small                                                            |                             |                                |                               |                                  |
| 11               | 15               | 11                         | One chromosome                                                                       |                             |                                |                               |                                  |
| 12               | 11               | 12                         | Attached to 13                                                                       |                             |                                |                               |                                  |
| 13               | 17q              | 13                         | Attached to 12                                                                       |                             |                                |                               |                                  |
| 14               | 16               | 14                         | Clear on one similarly sized chromosome                                              |                             |                                |                               |                                  |
| 15               | 32+ZW            | 15                         | Clear on one similarly sized chromosome                                              |                             |                                |                               |                                  |
| 16               |                  | 16                         | No result                                                                            |                             |                                |                               |                                  |
| 17               | 25               | 17                         | Clear on one similarly sized chromosome                                              |                             |                                |                               |                                  |
| 18               | 9                | 18                         | Clear on one similarly sized chromosome                                              |                             |                                |                               |                                  |
| 19               | 27               | 19                         | Clear on one similarly sized chromosome                                              |                             |                                |                               |                                  |
| 20               | 10               | 20                         | No result                                                                            |                             |                                |                               |                                  |
| 21               | 23               | 21                         | Clear on one similarly sized chromosome                                              |                             |                                |                               |                                  |
| 22               | 31               | 22                         | No result                                                                            |                             |                                |                               |                                  |
| 23               | 26               | 23                         | Clear on one similarly sized chromosome                                              |                             |                                |                               |                                  |
| 24               | 9b               | 24                         | Clear on one similarly sized chromosome                                              |                             |                                |                               |                                  |
| 25               | 21               | 25                         | Clear on one similarly sized chromosome                                              |                             |                                |                               |                                  |
| 26               | 19               | 26                         | Clear on one similarly sized chromosome                                              |                             |                                |                               |                                  |
| 27               | 13               | 27                         | Clear on one similarly sized chromosome                                              |                             |                                |                               |                                  |
| 28               | 22               | 28                         | Clear signal on one, similarly sized                                                 |                             |                                |                               |                                  |
| 34               | 1                | 29-38                      | Paint not successful in                                                              |                             |                                |                               |                                  |
| Z                | 6                | Z                          | One autosome                                                                         | Z                           | 6                              | Z                             | 6                                |
| W                | 6                | W                          | No signal                                                                            |                             |                                |                               |                                  |

**Supplemental Table S4:** Quality comparison between our HiRise *Apalone spinifera* assembly and a publicly available fragmentary *A. spinifera* assembly (GCA\_000385615.1) scaffolded here using Ragtag2 v.2.1.0 followed by an Omni-C scaffolding as described by (Alonge et al. 2022) as described in the text.

|                | <i>de novo Apalone spinifera</i><br>(Dovetail HiRise) |               | <i>Apalone spinifera</i><br>(scaffolded GCA_000385615.1) |               |
|----------------|-------------------------------------------------------|---------------|----------------------------------------------------------|---------------|
|                | Mbp                                                   | No. scaffolds | Mbp                                                      | No. scaffolds |
| <b>Total</b>   | 1904.79                                               | 6146          | 1946.49                                                  | 132544        |
| <b>N50</b>     | 120.19                                                | 5             | 75.58                                                    | 7             |
| <b>N90</b>     | 24.44                                                 | 20            | 62.97                                                    | 26            |
| <b>L50</b>     | 5                                                     |               | 7                                                        |               |
| <b>L90</b>     | 20                                                    |               | 26                                                       |               |
| <b>N_count</b> | 22.08                                                 |               | 68.50                                                    |               |
| <b>Gaps</b>    | 0.22                                                  |               | 0.69                                                     |               |
| <b>Average</b> | 0.31                                                  |               | 0.01                                                     |               |
| <b>Largest</b> | 317.84                                                |               | 240.20                                                   |               |

**Supplemental Table S5:** Quality metrics of Hi-C data per species.

| Metric                                          | Human             | African Elephant               | Tasmanian Devil                | Platypus           | Chicken               | Emu               | Softshell turtle | Musk turtle |
|-------------------------------------------------|-------------------|--------------------------------|--------------------------------|--------------------|-----------------------|-------------------|------------------|-------------|
| Raw read pairs                                  | 200,000,000       | 422,511,000                    | 415,946,000                    | 200,000,000        | 176,543,289           | 211,025,822       | 118,849,394      | 281,312,029 |
| Trimmed read pairs                              | 188,521,812       | 401,429,000                    | 343,209,000                    | 181,816,000        | 116,957,000           | 202,004,662       | 96,762,998       | 235,889,173 |
| Uniquely mapped read pairs                      | 159,445,487       | 357,906,000                    | 213,674,000                    | 143,299,478        | 91,697,153            | 189,078,494       | 63,775,530       | 219,764,560 |
| Self-circle (% relative uniquely mapped)        | 0.04              | 0.18                           | 0.08                           | 0.1                | 0.2                   | 0.10              | 0.12             | 0.07        |
| Dangling-end (% relative uniquely mapped)       | 1.31              | 0.13                           | 0.06                           | 21.49              | 20.2                  | 18.98             | 8.86             | 31.3        |
| Error (% relative uniquely mapped)              | 0.01              | 0.03                           | 0.02                           | 0.38               | 0.3                   | 0.39              | 0.39             | 0.21        |
| Extra dangling-end (% relative uniquely mapped) | 4.27              | 0.79                           | 0.88                           | 20.61              | 21.73                 | 41.60             | 31.58            | 37.48       |
| Too short (% relative uniquely mapped)          | 5.82              | 4.52                           | 3.35                           | 10.9               | 4.65                  | 12.03             | 18.93            | 14.57       |
| Too large (% relative uniquely mapped)          | 0.00              | 0.00                           | 0.00                           | 0.02               | 0.01                  | 0.00              | 0.00             | 0.00        |
| Duplicated (% relative uniquely mapped)         | 1.17              | 8.98                           | 7.92                           | 6.2                | 10.62                 | 16.13             | 9.26             | 15.96       |
| Random breaks (% relative uniquely mapped)      | 0.02              | 0.23                           | 0.1                            | 3.09               | 1.55                  | 7.23              | 6.34             | 0.61        |
| Total valid read pairs                          | 115,324,903       | 291,377,452                    | 157,886,926                    | 65,702,542         | 44,048,141            | 117,547,318       | 55,867,986       | 141,792,321 |
| Average genome coverage                         | 5.79              | 14.56                          | 7.89                           | 4.9                | 6.20                  | 13.78             | 4.02             | 16.21       |
| Total valid (% relative to Raw)                 | 57.66             | 68.96                          | 37.96                          | 32.85              | 24.95                 | 55.70             | 47.01            | 50.40       |
| Total valid (% relative to Trimmed)             | 61.17             | 72.59                          | 46.00                          | 36.14              | 37.66                 | 58.19             | 57.74            | 60.11       |
| Total valid (% relative to Mapped uniquely)     | 72.33             | 81.41                          | 73.89                          | 45.85              | 48.04                 | 62.17             | 87.60            | 64.52       |
| SOURCE                                          | Rao et al. (2014) | Álvarez-González et al. (2022) | Álvarez-González et al. (2022) | Zhou et al. (2021) | Fishman et al. (2019) | Liu et al. (2021) | This paper       | This paper  |



**Supplemental Figure S1: (A)** Total number of genes and average gene length by chromosome length in three turtles and chicken: *Apalone spinifera* (this study), *Staurotypus triporcatus* (this study), *Trachemys scripta elegans* (Simison et al. 2020), and *Gallus gallus* (Warren et al. 2023). **(B)** Comparative quality data for *Apalone spinifera* (this study), *Staurotypus triporcatus* (this study), and 13 other published genome assemblies cited in the text. Tree based on (Thomson et al. 2021).

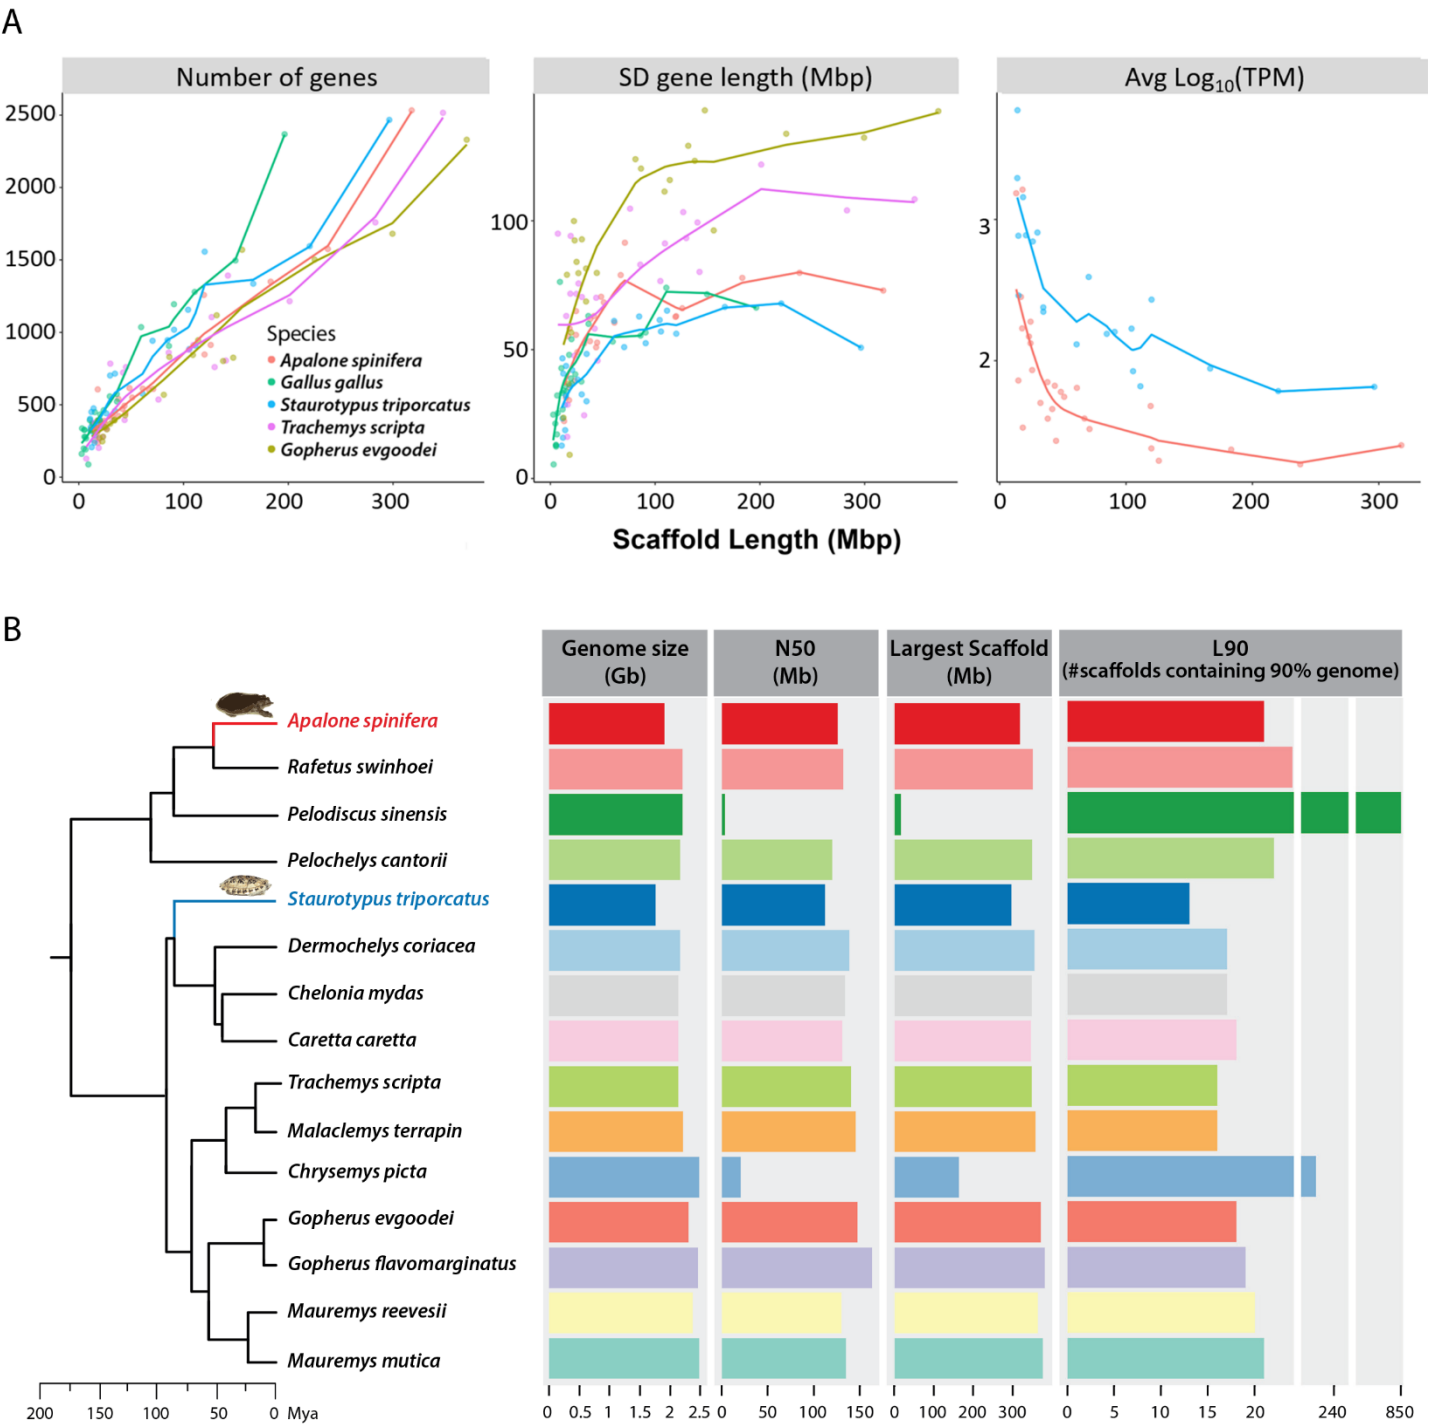

**Supplemental Figure S2: Chromosome-wise genome statistics.** Chromosome-wise gene content, GC content, and gene expression (Log<sub>10</sub> normalized TPM) for (A) *Apalone spinifera* (ASP) and (B) *Staurotypus triporcatus* (STR).

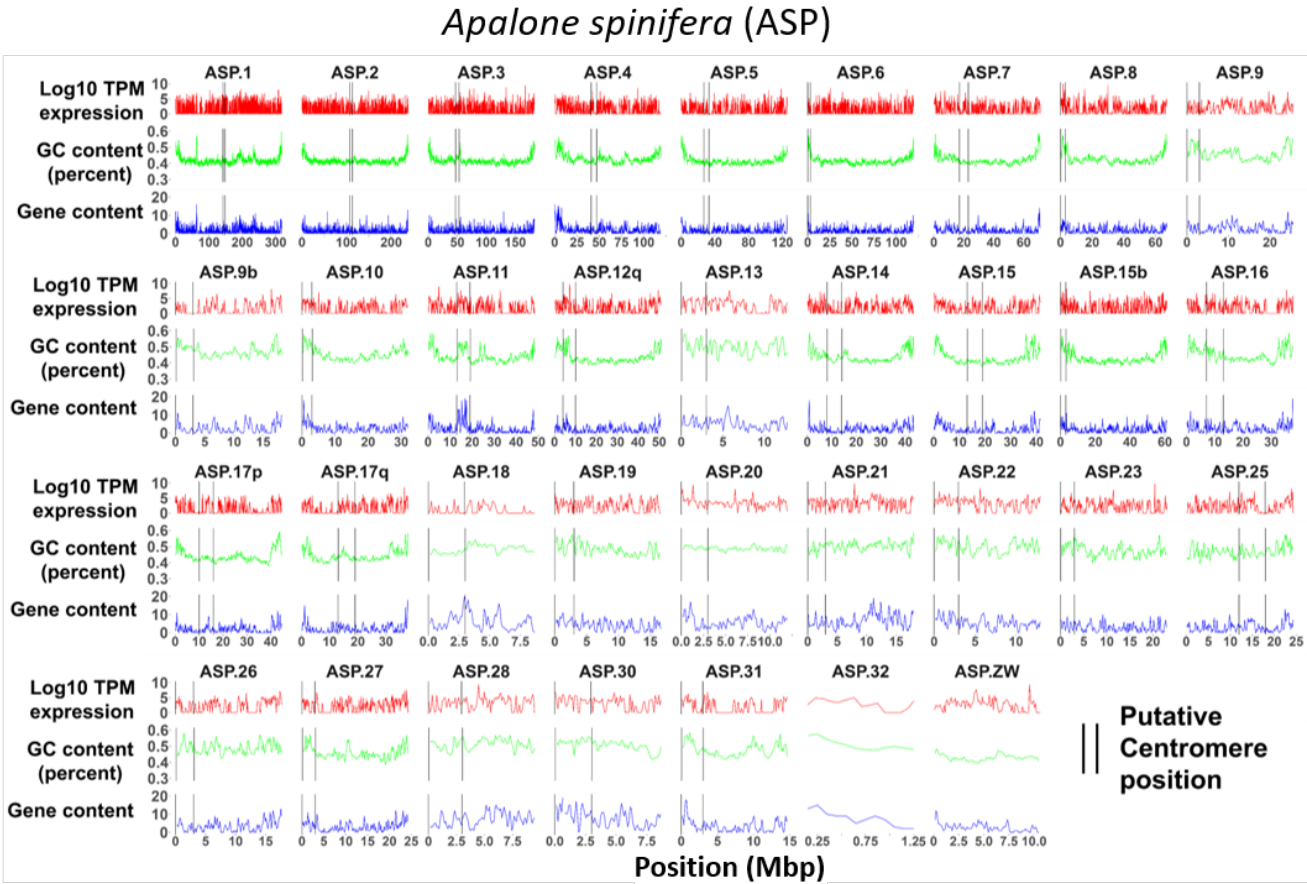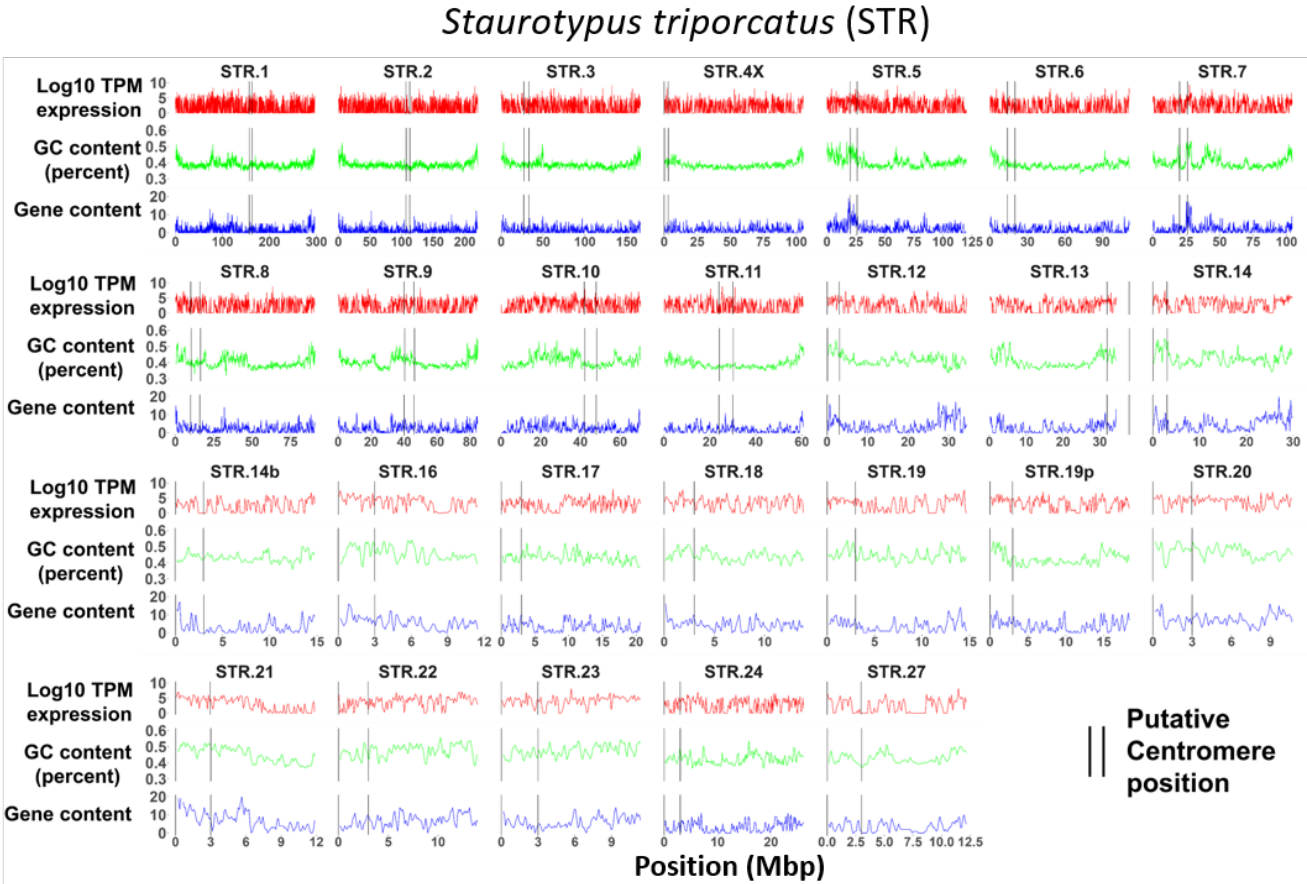

**Supplemental Figure S3:** (A) Flow sorting of *Trachemys* chromosomes via flow cytometry generated 18 probes, named A-Q. (B) Example of whole chromosome painting onto *Trachemys picta* metaphase chromosomes using the probes obtained by flow sorting, which permits identifying cytogenetically each flow sorted chromosome or group of chromosomes. (C) *Trachemys* and *Chrysemys* karyotypes (Montiel et al. 2016) and ideograms of chromosomes assigned by the combination of whole chromosome painting (WCP) data and BAC-FISH data from this study (using BAC clones from a *Chrysemys* BAC library) and from the literature, [e.g. (Badenhorst et al. 2015; Lee et al. 2020)], as described in the main text.

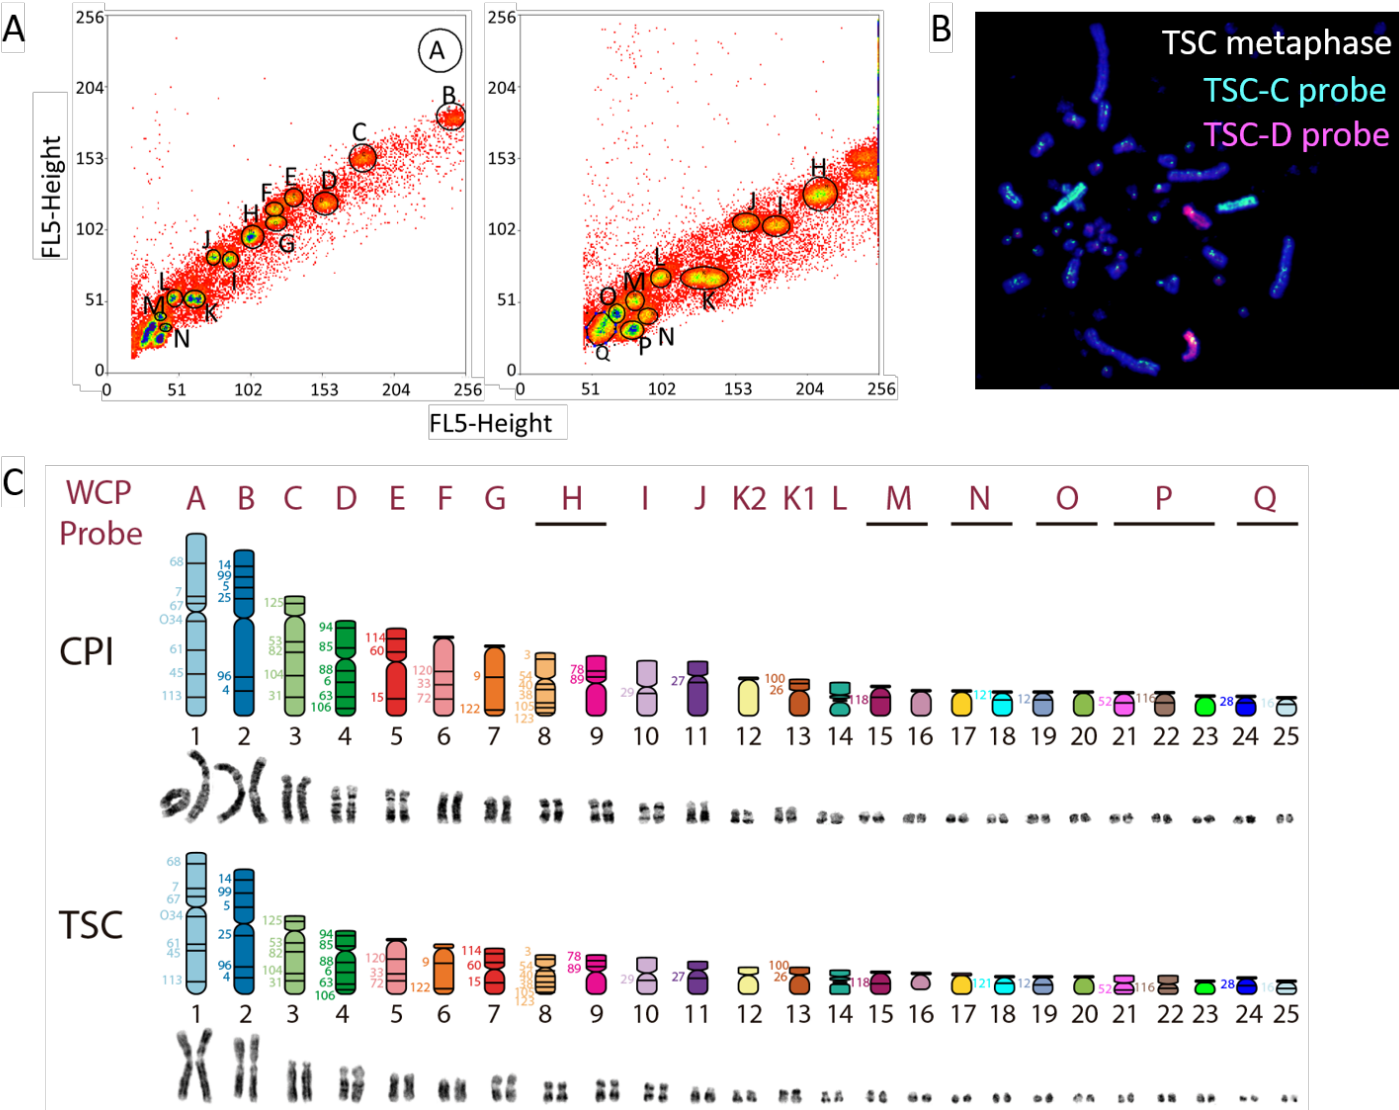



**Supplemental Figure S4:** (A) Whole-genome Hi-C contact maps for Sinaloan Thornscrub Tortoise [*Gopherus evgoodei*, (Rhie et al. 2021)], Mexican Giant Musk Turtle (*Staurotypus triporcatus*, this study) and Spiny Softshell Turtle (*Apalone spinifera*, this study). (B) Chromosome-specific Hi-C contact maps representing a pair of macro chromosomes for the same three species. Both telomeric and centromeric interactions are highlighted by circles.

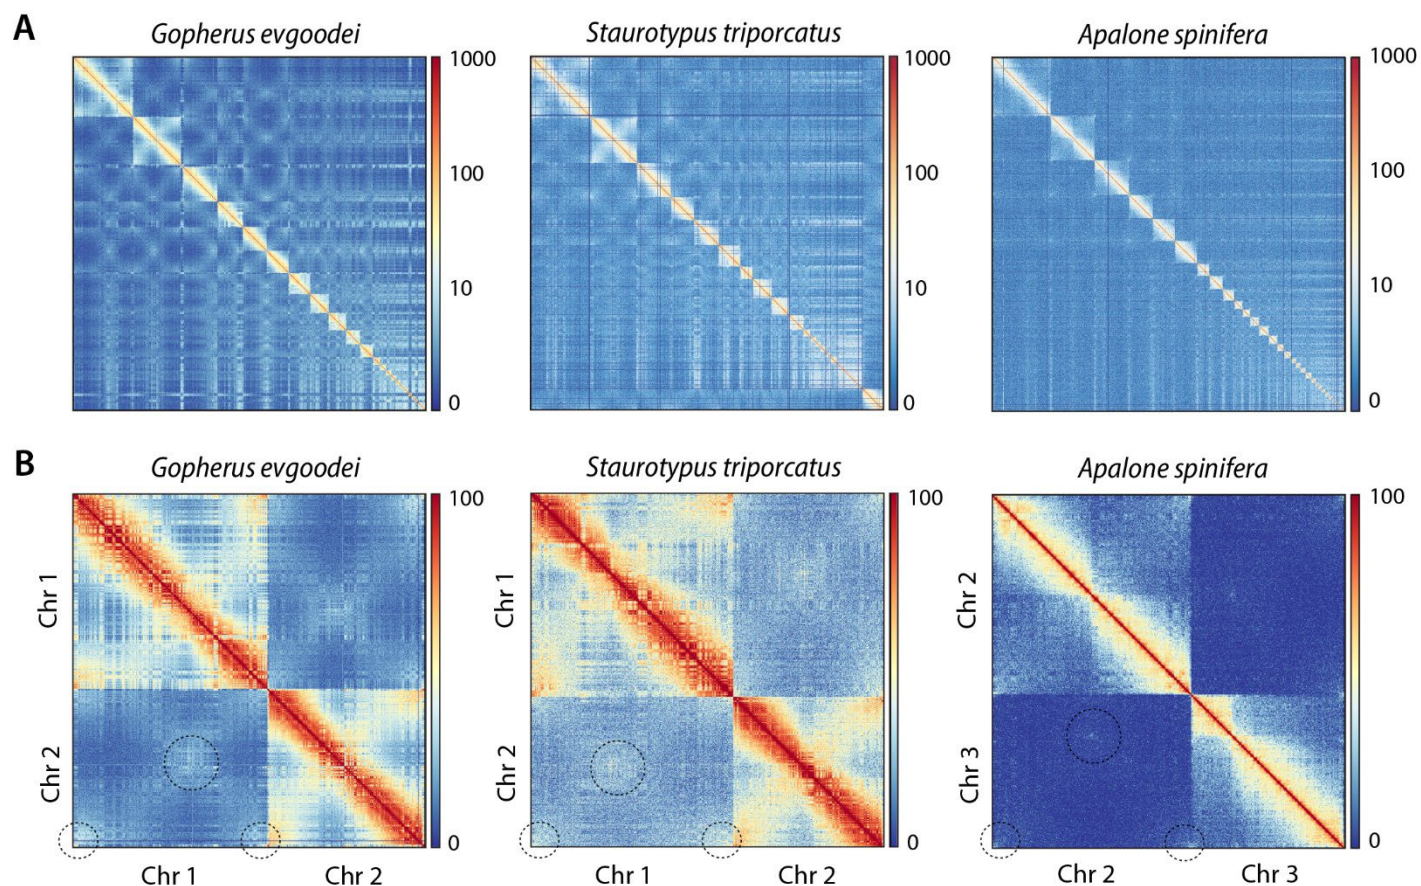

**Supplemental Figure S5: Genome compartmentalization in turtles. (A)** Chromosome 2 region-specific 500 kbp heatmaps, first eigenvector (green), insulator score (red) for Spiny Softshell Turtle [*Apalone spinifera* (ASP), this study], Mexican Giant Musk Turtle [*Staurotypus triporcatus* (STR), this study], and chicken [*Gallus gallus* (GGA), (Fishman et al. 2019)]. Positive and negative eigenvalues denote A and B compartments, respectively. Absolute eigenvalues reflect compartment definition (compartment strength) whereas insulation scores reflect how well-defined TADs are (points of no interaction would have a score  $\approx 0$ ). **(B)** Boxplots depicting  $\log_2$ -transformed first eigenvector values (i.e. compartment strength) and insulator score values (TAD boundary strength) for human [*Homo sapiens* (HSA), (Rao et al. 2014)], Emu [*Dromaius novaehollandiae* (DNO), (Liu et al. 2021b)], chicken [*Gallus gallus* (GGA), (Fishman et al. 2019)], Spiny Softshell Turtle [*Apalone spinifera* (ASP), this study], and Mexican Giant Musk Turtle [*Staurotypus triporcatus* (STR), this study]. Darker and lighter color tones in the top B panel denote values for macro- and micro-chromosomes, respectively. Asterisks represent statistically significant different interactions between species (two-tailed  $t$ -test, \*\*\* $p < 0.001$ ). ns: non-significant.

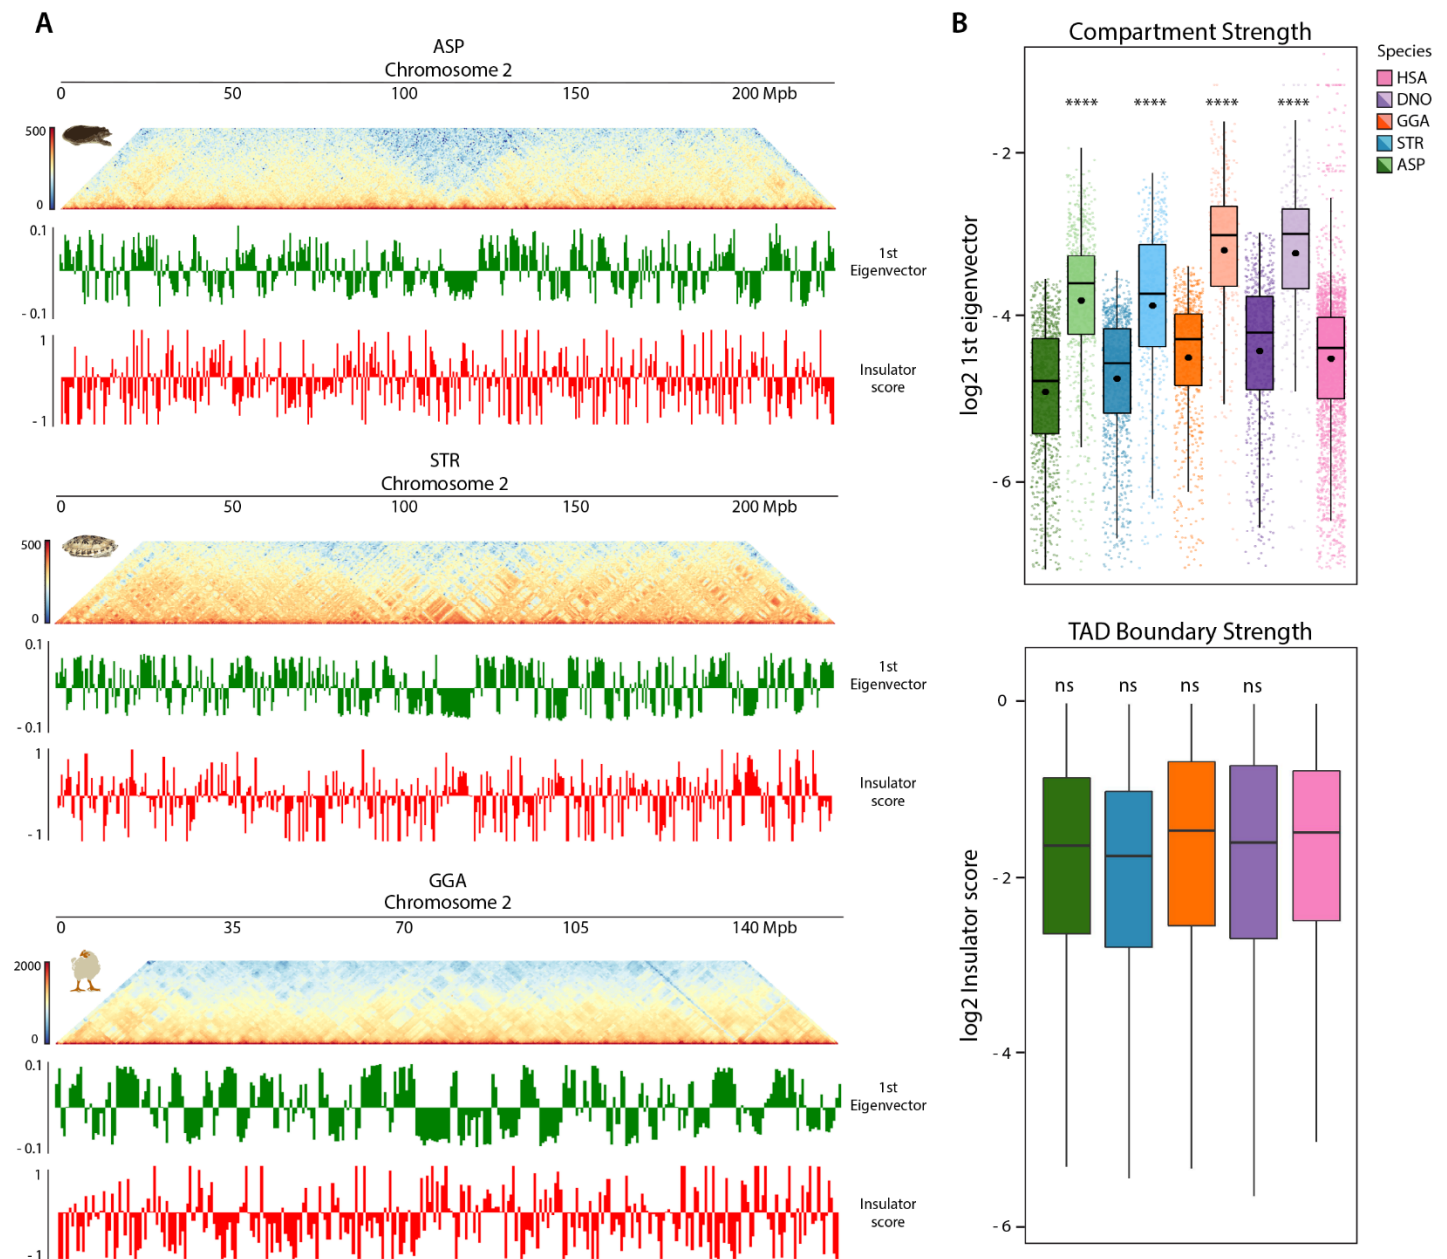

**Supplemental Figure S6: Conservation of chromatin structure in sauropsids. (A)** Percentage of compartments (upper panel) and TADs (lower panel) conserved between chicken and *Apalone* and between chicken (green) and *Staurotypus* turtles (blue), genome-wide (total) and for macro and micro-chromosomes separately. *Gallus gallus* (GGA), *Apalone spinifera* (ASP), and *Staurotypus triporcatus* (STR). **(B)** Chicken chromosome ideograms color-coded accordingly to the conservation of TADs of syntenic blocks between *Gallus* and *Apalone* (upper panel) and between *Gallus* and *Staurotypus* (lower panel), expressed as p-value scores (statistically significant p-values are denoted in gray).

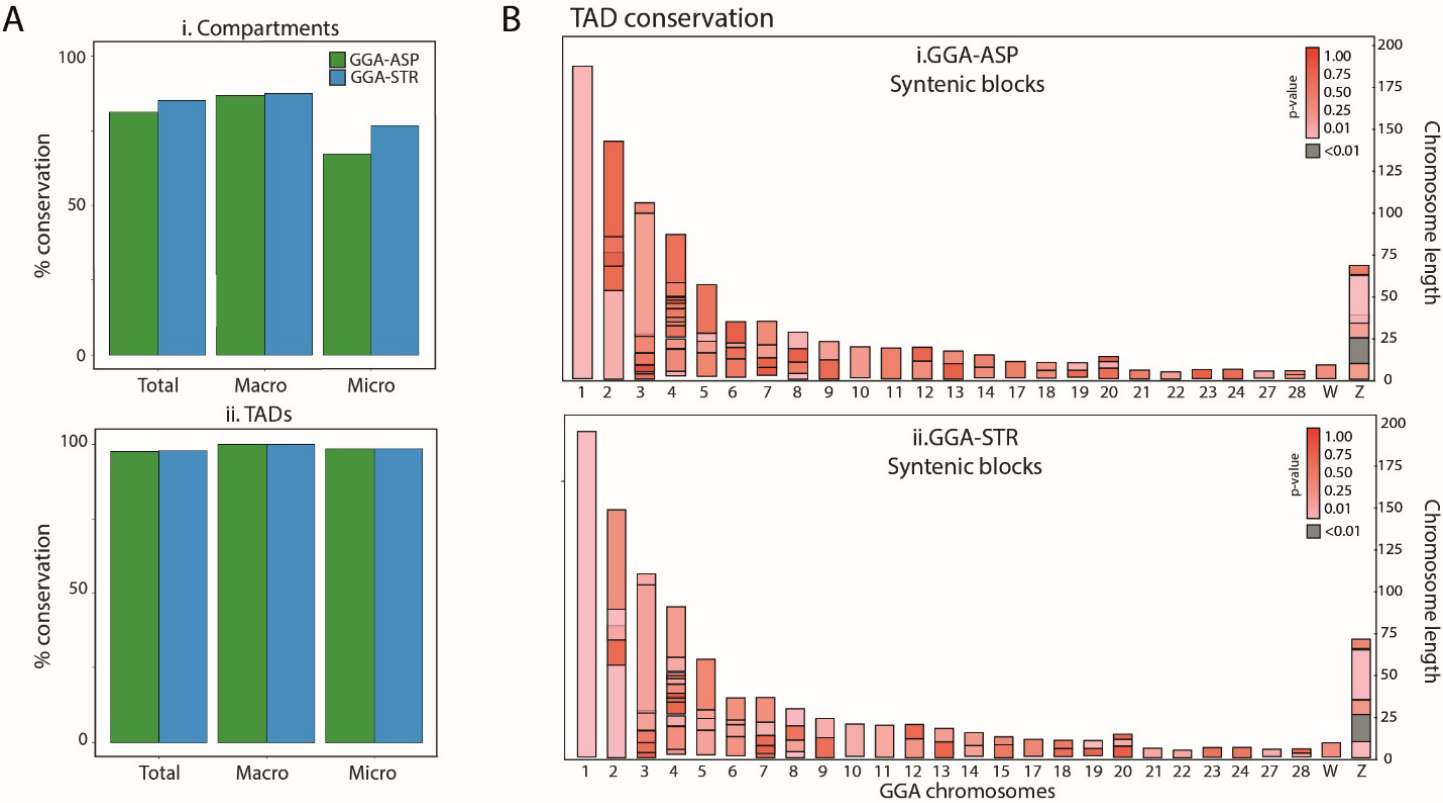

## SUPPLEMENTARY REFERENCES

- Alonge M, Lebeigle L, Kirsche M, Jenike K, Ou SJ, Aganezov S, Wang XA, Lippman ZB, Schatz MC, Soyk S. 2022. Automated assembly scaffolding using RagTag elevates a new tomato system for high-throughput genome editing. *Genome Biol* **23**.
- Badenhorst D, Hillier LW, Literman R, Montiel EE, Radhakrishnan S, Shen Y, Minx P, Janes DE, Warren WC, Edwards SV et al. 2015. Physical mapping and refinement of the painted turtle genome (*Chrysemys picta*) inform amniote genome evolution and challenge turtle-bird chromosomal conservation. *Genome Biol Evol* **7**: 2038-2050.
- Badenhorst D, Stanyon R, Engstrom T, Valenzuela N. 2013. A ZZ/ZW microchromosome system in the spiny softshell turtle, *Apalone spinifera*, reveals an intriguing sex chromosome conservation in Trionychidae. *Chrom Res* **21**: 137-147.
- Bentley BP, Carrasco-Valenzuela T, Ramos EKS, Pawar H, Souza Arantes L, Alexander A, Banerjee SM, Masterson P, Kuhlwilm M, Pippel M et al. 2023. Divergent sensory and immune gene evolution in sea turtles with contrasting demographic and life histories. *Proc Natl Acad Sci* **120**: e2201076120.
- Bolger AM, Lohse M, Usadel B. 2014. Trimmomatic: a flexible trimmer for Illumina sequence data. *Bioinformatics* **30**: 2114-2120.
- Chang G, Jones S, Leelakumari S, Ashkani J, Culibrk L, O'Neill K, Tse K, Cheng D, Chuah E, McDonald H. 2023. The genome sequence of the Loggerhead sea turtle, *Caretta caretta* Linnaeus 1758. *F1000Research* **12**: 336.
- Chapman JA, Ho I, Sunkara S, Luo SJ, Schroth GP, Rokhsar DS. 2011. Meraculous: De Novo Genome Assembly with Short Paired-End Reads. *Plos One* **6**.
- Dudchenko O, Batra SS, Omer AD, Nyquist SK, Hoeger M, Durand NC, Shamim MS, Machol I, Lander ES, Aiden AP et al. 2017. De novo assembly of the *Aedes aegypti* genome using Hi-C yields chromosome-length scaffolds. *Science* **356**: 92-95.
- Fishman V, Battulin N, Nuriddinov M, Maslova A, Zlotina A, Strunov A, Chervyakova D, Korablev A, Serov O, Krasikova A. 2019. 3D organization of chicken genome demonstrates evolutionary conservation of topologically associated domains and highlights unique architecture of erythrocytes' chromatin. *Nucleic Acids Res* **47**: 648-665.
- Kajitani R, Toshimoto K, Noguchi H, Toyoda A, Ogura Y, Okuno M, Yabana M, Harada M, Nagayasu E, Maruyama H et al. 2014. Efficient de novo assembly of highly heterozygous genomes from whole-genome shotgun short reads. *Genome Res* **24**: 1384-1395.
- Kawagoshi T, Uno Y, Matsubara K, Matsuda Y, Nishida C. 2009. The ZW micro-sex chromosomes of the chinese soft-shelled turtle (*Pelodiscus sinensis*, Trionychidae, Testudines) have the same origin as chicken chromosome 15. *Cytogenet Genome Res* **125**: 125-131.
- Lee LS, Navarro-Domínguez BM, Wu Z, Montiel Jiménez EE, Badenhorst D, Bista B, Gessler TB, Valenzuela N. 2020. Karyotypic evolution of sauropsid vertebrates illuminated by optical and physical mapping of the painted turtle and slider turtle genomes. *Genes* **11**: 928.
- Li Y, Liu Y, Zheng J, Wu B, Cui X, Xu W, Zhu C, Qiu Q, Wang K. 2024. A chromosome-level genome assembly of the pig-nosed turtle (*Carettochelys insculpta*). *Sci Data* **11**: 311.
- Lieberman-Aiden E, van Berkum NL, Williams L, Imakaev M, Ragoczy T, Telling A, Amit I, Lajoie BR, Sabo PJ, Dorschner MO et al. 2009. Comprehensive mapping of long-range interactions reveals folding principles of the human genome. *Science* **326**: 289-293.
- Liu J, Liu S, Zheng K, Tang M, Gu L, Young J, Wang Z, Qiu Y, Dong J, Gu S et al. 2021a. Chromosome-level genome assembly of the Chinese three-keeled pond turtle (*Mauremys reevesii*) provides insights into freshwater adaptation. *Mol Ecol Resour* doi:10.1111/1755-0998.13563.
- Liu J, Wang ZJ, Li J, Xu LH, Liu JQ, Feng SH, Guo CX, Chen SC, Ren ZJ, Rao JP et al. 2021b. A new emu genome illuminates the evolution of genome configuration and nuclear architecture of avian chromosomes. *Genome Res* **31**: 497-511.
- Liu X, Wang Y, Yuan J, Liu F, Hong X, Yu L, Chen C, Li W, Ni W, Liu H et al. 2022. Chromosome-level genome assembly of Asian yellow pond turtle (*Mauremys mutica*) with temperature-dependent sex determination system. *Sci Rep* **12**: 7905.
- Liu XL, Liu HY, Wang YK, Li MZ, Ji LQ, Wang KK, Wei CQ, Li W, Chen C, Yu LY et al. 2023. Chromosome-level analysis of the *Pelochelys cantorii* genome provides insights to its immunity, growth and longevity. *Biology-Basel* **12**.
- Montiel EE, Badenhorst D, Lee LS, Literman R, Trifonov V, Valenzuela N. 2016. Cytogenetic insights into the evolution of chromosomes and sex determination reveal striking homology of turtle sex chromosomes to amphibian autosomes. *Cytogenet Genome Res* **148**: 292-304.

- Putnam NH, O'Connell BL, Stites JC, Rice BJ, Blanchette M, Calef R, Troll CJ, Fields A, Hartley PD, Sugnet CW et al. 2016. Chromosome-scale shotgun assembly using an in vitro method for long-range linkage. *Genome Res* **26**: 342-350.
- Rao SSP, Huntley MH, Durand NC, Stamenova EK, Bochkov ID, Robinson JT, Sanborn AL, Machol I, Omer AD, Lander ES et al. 2014. A 3D map of the human genome at kilobase resolution reveals principles of chromatin looping. *Cell* **159**: 1665-1680.
- Ren Y, Zhang Q, Yan X, Hou D, Huang H, Li C, Rao D, Li Y. 2022. Genomic insights into the evolution of the critically endangered soft-shelled turtle *Rafetus swinhoei*. *Mol Ecol Resour* **22**.
- Rhie A, McCarthy SA, Fedrigo O, Damas J, Formenti G, Koren S, Uliano-Silva M, Chow W, Fungtammasan A, Kim J et al. 2021. Towards complete and error-free genome assemblies of all vertebrate species. *Nature* **592**: 737-746.
- Robinson JT, Turner D, Durand NC, Thorvaldsdóttir H, Mesirov JP, Aiden EL. 2018. Juicebox.js Provides a Cloud-Based Visualization System for Hi-C Data. *Cell Systems* **6**: 256-+.
- Simison WB, Parham JF, Papenfuss TJ, Lam AW, Henderson JB. 2020. An annotated chromosome-level reference genome of the red-eared slider turtle (*Trachemys scripta elegans*). *Genome Biol Evol* **12**: 456-462.
- Thomson RC, Spinks PQ, Shaffer HB. 2021. A global phylogeny of turtles reveals a burst of climate-associated diversification on continental margins. *Proc Natl Acad Sci* **118**: e2012215118.
- Wang Z, Pascual-Anaya J, Zadissa A, Li W, Niimura Y, Huang Z, Li C, White S, Xiong Z, Fang D et al. 2013. The draft genomes of soft-shell turtle and green sea turtle yield insights into the development and evolution of the turtle-specific body plan. *Nat Genet* **45**: 701-706.
- Warren W, Smith J, Drechsler Y, Cheng HH, Howe K. 2023. Multiple chicken (*Gallus gallus*) genome references to advance genetic variation studies. Single haplotype chicken genome assemblies. *Cytogenet Genome Res* **162**: 405-528.
